# Supplementary material
Source: publisher figshare collection journal article supplement (https://frontiersin.figshare.com/ndownloader/files/26060564)
Supplement: Supplementary file 1 [file 26060564]

| Motif Logo | Motif         | Motif Score | Foreground |      | Background |        | Fold Increase |
|------------|---------------|-------------|------------|------|------------|--------|---------------|
|            |               |             | Matches    | Size | Matches    | Size   |               |
|            | K...P.SP..... | 38.15       | 42         | 5709 | 218        | 733195 | 24.74         |
|            | ....P.SP..... | 32          | 483        | 5667 | 6078       | 732977 | 10.28         |
|            | ...RS.SP..... | 39.51       | 109        | 5184 | 551        | 726899 | 27.74         |
|            | .....SPPR.... | 41.54       | 55         | 5075 | 280        | 726348 | 28.11         |
|            | ...R..SP..... | 32          | 252        | 5020 | 2472       | 726068 | 14.74         |
|            | .....SP...R.  | 32          | 215        | 4768 | 2662       | 723596 | 12.26         |
|            | .....SP...K.  | 32          | 186        | 4553 | 2147       | 720934 | 13.72         |
|            | .....SP.R.... | 32          | 158        | 4367 | 1879       | 718787 | 13.84         |
|            | .....SP....K  | 31.18       | 133        | 4209 | 1681       | 716908 | 13.48         |
|            | .....SP.K.... | 29.25       | 118        | 4076 | 1591       | 715227 | 13.01         |
|            | ....R.SP..... | 27.82       | 135        | 3958 | 2138       | 713636 | 11.38         |
|            | .R....SP..... | 27.91       | 112        | 3823 | 1745       | 711498 | 11.95         |
|            | .....SP..K..  | 25.94       | 82         | 3711 | 1287       | 709753 | 12.19         |
|            | ...RR.S.....  | 32          | 196        | 3629 | 3194       | 708466 | 11.98         |
|            | ..R...SP..... | 23.64       | 80         | 3433 | 1478       | 705272 | 11.12         |
|            | ..K...SP..... | 23.86       | 68         | 3353 | 1221       | 703794 | 11.69         |
|            | .....SD.E.E.  | 40.06       | 55         | 3285 | 436        | 702573 | 26.98         |
|            | .....SPK....  | 24.04       | 57         | 3230 | 981        | 702137 | 12.63         |
|            | .....SDEE...  | 43.3        | 39         | 3173 | 365        | 701156 | 23.61         |
|            | .R.R..S.....  | 32          | 139        | 3134 | 3269       | 700791 | 9.51          |
|            | R.....SP..... | 24          | 66         | 2995 | 1291       | 697522 | 11.91         |
|            | .....DSE.E... | 42.23       | 40         | 2929 | 445        | 696231 | 21.37         |
|            | .....SPR....  | 22.7        | 59         | 2889 | 1274       | 695786 | 11.15         |
|            | .....SDDE...  | 38.36       | 27         | 2830 | 244        | 694512 | 27.16         |
|            | .....SD.E.... | 32          | 76         | 2803 | 2412       | 694268 | 7.8           |
|            | .....SDED...  | 40.86       | 30         | 2727 | 285        | 691856 | 26.71         |
|            | .....SPP....  | 23.18       | 87         | 2697 | 2279       | 691571 | 9.79          |
|            | ...R..S..D... | 30.88       | 69         | 2610 | 1599       | 689292 | 11.4          |
|            | .....S.EE...  | 28.81       | 110        | 2541 | 5115       | 687693 | 5.82          |
|            | ...RS.S.....  | 32          | 80         | 2431 | 3638       | 682578 | 6.17          |
|            | .....SPT....  | 23.9        | 59         | 2351 | 1401       | 678940 | 12.16         |
|            | ...R..S.E.... | 25.15       | 45         | 2292 | 1830       | 677539 | 7.27          |
|            | .....SP.....  | 16          | 337        | 2247 | 19312      | 675709 | 5.25          |
|            | .....S.DE...  | 32          | 69         | 1910 | 2280       | 656397 | 10.4          |
|            | ...RQ.S.....  | 24.2        | 39         | 1841 | 1305       | 654117 | 10.62         |



|                |       |     |      |       |        |        |
|----------------|-------|-----|------|-------|--------|--------|
| .....S.ED...   | 27.06 | 55  | 1802 | 2794  | 652812 | 7.13   |
| ...R...SD..... | 22.5  | 29  | 1747 | 1043  | 650018 | 10.35  |
| ...KR.S.....   | 29.49 | 49  | 1718 | 2131  | 648975 | 8.69   |
| .....DSD.....  | 32    | 50  | 1669 | 1857  | 646844 | 10.44  |
| ...R...S..E... | 23.57 | 29  | 1619 | 1595  | 644987 | 7.24   |
| ..RR..S.....   | 22.96 | 28  | 1590 | 1620  | 643392 | 6.99   |
| R.....S.E....  | 22.69 | 29  | 1562 | 1826  | 641772 | 6.53   |
| .....SE.E...   | 22.82 | 37  | 1533 | 2929  | 639946 | 5.27   |
| .....S.DD...   | 29.26 | 42  | 1496 | 1792  | 637017 | 9.98   |
| ....R.S.S....  | 23.05 | 42  | 1454 | 3258  | 635225 | 5.63   |
| .....S.E....   | 16    | 159 | 1412 | 30848 | 631967 | 2.31   |
| ...R..S.....   | 16    | 149 | 1253 | 20340 | 601119 | 3.51   |
| ..R..S.S.....  | 22.51 | 38  | 1104 | 3713  | 580779 | 5.38   |
| .....S..DL...  | 22.7  | 36  | 1066 | 2942  | 577066 | 6.62   |
| ..R...S.....   | 15.95 | 123 | 1030 | 30479 | 574124 | 2.25   |
| .....DS.....   | 13.08 | 97  | 907  | 25397 | 543645 | 2.29   |
| R.....S.....   | 12.85 | 96  | 810  | 27029 | 518248 | 2.27   |
| ....R.S.....   | 9.92  | 69  | 714  | 20268 | 491219 | 2.34   |
| .....GS.....   | 10.27 | 97  | 645  | 35179 | 470951 | 2.01   |
| ...K..S.....   | 8.63  | 69  | 548  | 25407 | 435772 | 2.16   |
| .....S..E...   | 7.23  | 57  | 479  | 22623 | 410365 | 2.16   |
| .....SD.D...   | 14.06 | 14  | 422  | 1064  | 387742 | 12.09  |
| .....S.D....   | 7.52  | 47  | 408  | 18387 | 386678 | 2.42   |
| .....SSP....   | 12.6  | 23  | 361  | 3961  | 368291 | 5.92   |
| .....S.S....   | 6.11  | 72  | 338  | 43491 | 364330 | 1.78   |
| ...R...TPP.... | 38.33 | 26  | 651  | 167   | 459774 | 109.96 |
| .....TPP....   | 32    | 113 | 625  | 2512  | 459607 | 33.08  |
| ...P..TP.....  | 28.86 | 73  | 512  | 3179  | 457095 | 20.5   |
| ...R...TP..... | 27.53 | 39  | 439  | 1432  | 453916 | 28.16  |
| .....TPE....   | 22.02 | 33  | 400  | 2088  | 452484 | 17.88  |
| .....TPT....   | 22.69 | 26  | 367  | 1528  | 450396 | 20.88  |
| .....TP.....   | 16    | 95  | 341  | 20538 | 448868 | 6.09   |
| ...R..T.....   | 10.61 | 42  | 246  | 22708 | 428330 | 3.22   |
| .....TSP....   | 19.01 | 21  | 204  | 2883  | 405622 | 14.48  |
